# Supplementary material
Source: publisher figshare collection journal article supplement (https://tandf.figshare.com/ndownloader/files/33931049)
Supplement: Supplementary file 1 [file 33931049]

**Supplemental Figure 1: Flow Diagram**

Enrolled patients (n= 173)

Excluded

  Missing acute assessment (n=17)

  Missing follow-up assessment (n=80)

Patients considered for analysis (n=76)

Excluded

  No motor weakness at assessment (n=6)

  Significant cognitive impairment (n=1)

Final Cohort (n=69)
